# Supplementary material for: Macrofungi Cultivation in Shady Forest Areas Significantly Increases Microbiome Diversity, Abundance and Functional Capacity in Soil Furrows
Source: J Fungi (Basel). 2021 Sep 18;7(9):775. doi: 10.3390/jof7090775 (PMC8469386; doi:10.3390/jof7090775)
Supplement: Supplementary file 1 [file jof-07-00775-s001.zip]

Archive with 8 entries (8 files):
- Fig. S1_ new.pdf
- Supplementary file 1-proof.pdf
- Supplementary Tables S1.xlsx
- Supplementary Tables S2.xlsx
- Supplementary Tables S3.xlsx
- Supplementary Tables S4.xlsx
- Supplementary Tables S5.xlsx
- Supplementary Tables S6.xlsx
