# Supplementary material for: Macrofungi Cultivation in Shady Forest Areas Significantly Increases Microbiome Diversity, Abundance and Functional Capacity in Soil Furrows
Source: J Fungi (Basel). 2021 Sep 18;7(9):775. doi: 10.3390/jof7090775 (PMC8469386; doi:10.3390/jof7090775)
Supplement: Supplementary file 1 [file jof-07-00775-s001.zip › Supplementary Tables S1.xlsx]

## Sheet: Table S1
Supplementary Table 1. Relative abundances (%) of soil bacterial phylum in Stropharia rugosoannulata cultivation plots.
Phylum level	Control	Lessly influenced	Strongly influenced	Mean
k__Bacteria;p__Proteobacteria	0.297767	0.325722	0.304799	0.30943
k__Bacteria;p__Acidobacteria	0.221593	0.212339	0.216245	0.216726
k__Bacteria;p__Chloroflexi	0.144083	0.172333	0.213016	0.176477
k__Bacteria;p__Actinobacteria	0.189193	0.118107	0.0824941	0.129931
k__Bacteria;p__Gemmatimonadetes	0.0525767	0.090134	0.0938325	0.0788478
k__Bacteria;p__Planctomycetes	0.0318794	0.0274865	0.0275212	0.0289624
k__Bacteria;p__Verrucomicrobia	0.0161307	0.0116162	0.0124149	0.0133873
k__Bacteria;p__Bacteroidetes	0.0144117	0.0107133	0.0137345	0.0129532
k__Bacteria;p__Rokubacteria	0.00536533	0.00774413	0.0125365	0.00854864
k__Bacteria;p__WPS-2	0.00927212	0.00612932	0.00604251	0.00714798
k__Bacteria;p__Latescibacteria	0.000677177	0.0048097	0.00538269	0.00362319
k__Bacteria;p__Patescibacteria	0.00303862	0.00416725	0.00213571	0.00311386
k__Bacteria;p__Firmicutes	0.00618141	0.000659814	0.00118072	0.00267398
k__Bacteria;p__GAL15	0.00059036	0.00180581	0.00236144	0.00158587
k__Bacteria;p__unclassified_Bacteria	0.00199681	0.00119808	0.00137172	0.0015222
k__Bacteria;p__Elusimicrobia	0.00114599	0.00196208	0.0012849	0.00146432
k__Bacteria;p__Armatimonadetes	0.000763995	0.000902903	0.00059036	0.000752419
k__Bacteria;p__Nitrospirae	0.000364634	0.00064245	0.00107654	0.000694541
k__Bacteria;p__FCPU426	0.00093763	0.00029518	0.000468815	0.000567208
k__Bacteria;p__Cyanobacteria	0.000277816	0.000555633	0.000729268	0.000520906
k__Bacteria;p__Dependentiae	0.00102445	0.000364634	6.94541e-05	0.000486179
k__Bacteria;p__Deinococcus-Thermus	0.000260453	6.94541e-05	0.000190999	0.000173635
k__Archaea;p__Euryarchaeota	0	0.000104181	0.00029518	0.00013312
k__Bacteria;p__Entotheonellaeota	0.000243089	6.94541e-05	5.20906e-05	0.000121545
k__Bacteria;p__Chlamydiae	0	6.94541e-05	0.000121545	6.36662e-05
k__Bacteria;p__Fibrobacteres	0.000121545	0	0	4.05149e-05
k__Bacteria;p__BRC1	6.94541e-05	0	0	2.31514e-05
k__Bacteria;p__Deferribacteres	3.4727e-05	0	0	1.15757e-05
k__Bacteria;p__Spirochaetes	0	0	3.4727e-05	1.15757e-05
k__Bacteria;p__FBP	0	0	1.73635e-05	5.78784e-06
