# Supplementary material for: Macrofungi Cultivation in Shady Forest Areas Significantly Increases Microbiome Diversity, Abundance and Functional Capacity in Soil Furrows
Source: J Fungi (Basel). 2021 Sep 18;7(9):775. doi: 10.3390/jof7090775 (PMC8469386; doi:10.3390/jof7090775)
Supplement: Supplementary file 1 [file jof-07-00775-s001.zip › Supplementary Tables S2.xlsx]

## Sheet: Table S2
Supplementary Table 2. Relative abundances (%) of soil bacterial class in Stropharia rugosoannulata cultivation plots.
Class level	Control	Lessly influenced	Strongly influenced	Mean
k__Bacteria;p__Acidobacteria;c__Acidobacteriia	0.185477	0.187665	0.194645	0.189262
k__Bacteria;p__Proteobacteria;c__Alphaproteobacteria	0.183185	0.186641	0.153459	0.174428
k__Bacteria;p__Chloroflexi;c__AD3	0.0958293	0.114877	0.15016	0.120289
k__Bacteria;p__Proteobacteria;c__Gammaproteobacteria	0.0935547	0.102549	0.116995	0.104366
k__Bacteria;p__Gemmatimonadetes;c__Gemmatimonadetes	0.0525767	0.090134	0.0938325	0.0788478
k__Bacteria;p__Actinobacteria;c__Actinobacteria	0.108869	0.0675094	0.045041	0.0738065
k__Bacteria;p__Actinobacteria;c__Thermoleophilia	0.0504237	0.0259585	0.0186484	0.0316769
k__Bacteria;p__Proteobacteria;c__Deltaproteobacteria	0.020923	0.0364808	0.034345	0.030583
k__Bacteria;p__Planctomycetes;c__Planctomycetacia	0.0309592	0.0262536	0.0262884	0.0278337
k__Bacteria;p__Chloroflexi;c__Ktedonobacteria	0.0207147	0.0286324	0.0270003	0.0254491
k__Bacteria;p__Actinobacteria;c__Acidimicrobiia	0.0297437	0.0242395	0.0173982	0.0237938
k__Bacteria;p__Acidobacteria;c__Subgroup 6	0.0169121	0.0129532	0.0125712	0.0141455
k__Bacteria;p__Chloroflexi;c__TK10	0.0110432	0.00993193	0.0203327	0.0137693
k__Bacteria;p__Verrucomicrobia;c__Verrucomicrobiae	0.0161307	0.0116162	0.0124149	0.0133873
k__Bacteria;p__Bacteroidetes;c__Bacteroidia	0.0136477	0.0101056	0.0130921	0.0122818
k__Bacteria;p__Rokubacteria;c__NC10	0.00536533	0.00774413	0.0125365	0.00854864
k__Bacteria;p__WPS-2;c__uncultured bacterium	0.00913321	0.00557369	0.00579942	0.00683544
k__Bacteria;p__Chloroflexi;c__KD4-96	0.00682386	0.00696277	0.00362898	0.0058052
k__Bacteria;p__Chloroflexi;c__Anaerolineae	0.0040457	0.00605987	0.00625087	0.00545215
k__Bacteria;p__Acidobacteria;c__Holophagae	0.00522642	0.00467079	0.00449715	0.00479812
k__Bacteria;p__Acidobacteria;c__Thermoanaerobaculia	0.00540006	0.00328171	0.00199681	0.00355952
k__Bacteria;p__Acidobacteria;c__Blastocatellia (Subgroup 4)	0.00682386	0.00213571	0.00105917	0.00333958
k__Bacteria;p__Chloroflexi;c__Chloroflexia	0.00284762	0.00298653	0.00225726	0.00269713
k__Bacteria;p__Firmicutes;c__Bacilli	0.00611196	0.000538269	0.00114599	0.00259874
k__Bacteria;p__Latescibacteria;c__unclassified_Latescibacteria	0.000121545	0.00394152	0.00368107	0.00258138
k__Bacteria;p__Patescibacteria;c__Saccharimonadia	0.00206626	0.00331643	0.00125017	0.00221096
k__Bacteria;p__unclassified_Bacteria;c__unclassified_Bacteria	0.00199681	0.00119808	0.00137172	0.0015222
k__Bacteria;p__Acidobacteria;c__Subgroup 17	0.00142381	0.00105917	0.00102445	0.00116914
k__Bacteria;p__Chloroflexi;c__JG30-KF-CM66	0.000816086	0.00138908	0.00105917	0.00108811
k__Bacteria;p__Chloroflexi;c__Gitt-GS-136	0.00112863	0.000833449	0.00100708	0.000989721
k__Bacteria;p__Elusimicrobia;c__Lineage IIa	0.000729268	0.00138908	0.000572996	0.000897115
k__Bacteria;p__Patescibacteria;c__Parcubacteria	0.000850813	0.000781359	0.000816086	0.000816086
k__Bacteria;p__Planctomycetes;c__BD7-11	0.00059036	0.000763995	0.00104181	0.000798722
k__Bacteria;p__Nitrospirae;c__Nitrospira	0.000364634	0.00064245	0.00107654	0.000694541
k__Bacteria;p__Bacteroidetes;c__Ignavibacteria	0.000763995	0.000607723	0.00064245	0.00067139
k__Bacteria;p__GAL15;c__uncultured bacterium	0	0.000868176	0.00107654	0.000648238
k__Bacteria;p__GAL15;c__unclassified_GAL15	0.000329907	0.000538269	0.000781359	0.000549845
k__Bacteria;p__Elusimicrobia;c__Elusimicrobia	0.000329907	0.000520906	0.000659814	0.000503542
k__Bacteria;p__Dependentiae;c__Babeliae	0.00102445	0.000364634	6.94541e-05	0.000486179
k__Bacteria;p__Armatimonadetes;c__Chthonomonadetes	0.000555633	0.000520906	0.000329907	0.000468815
k__Bacteria;p__Chloroflexi;c__Dehalococcoidia	0.000503542	0.000260453	0.000503542	0.000422512
k__Bacteria;p__Cyanobacteria;c__Melainabacteria	0.000173635	0.000416725	0.00059036	0.000393573
k__Bacteria;p__GAL15;c__uncultured Firmicutes bacterium	0.000260453	0.000399361	0.000503542	0.000387785
k__Bacteria;p__Acidobacteria;c__Subgroup 5	0.000190999	0.000520906	0.000381997	0.000364634
k__Bacteria;p__Chloroflexi;c__P2-11E	0.00029518	0.000156272	0.000572996	0.000341483
k__Bacteria;p__FCPU426;c__uncultured bacterium	0.000486179	0.000121545	0.000381997	0.000329907
k__Bacteria;p__Latescibacteria;c__uncultured Acidobacterium sp.	0.00034727	3.4727e-05	0.000520906	0.000300968
k__Bacteria;p__Actinobacteria;c__MB-A2-108	0.000156272	8.68176e-05	0.00059036	0.000277816
k__Bacteria;p__Latescibacteria;c__uncultured bacterium	0	0.000225726	0.000486179	0.000237301
k__Bacteria;p__WPS-2;c__uncultured Firmicutes bacterium	0	0.000468815	0.000243089	0.000237301
k__Bacteria;p__Actinobacteria;c__unclassified_Actinobacteria	0	0.000225726	0.000399361	0.000208362
k__Bacteria;p__FCPU426;c__unclassified_FCPU426	0.000416725	0.000121545	8.68176e-05	0.000208362
k__Bacteria;p__Deinococcus-Thermus;c__Deinococci	0.000260453	6.94541e-05	0.000190999	0.000173635
k__Bacteria;p__Actinobacteria;c__0319-7L14	0	8.68176e-05	0.000416725	0.000167847
k__Bacteria;p__Latescibacteria;c__metagenome	0	0.00034727	0.000121545	0.000156272
k__Bacteria;p__Planctomycetes;c__OM190	0.000104181	0.000225726	0.000138908	0.000156272
k__Bacteria;p__Latescibacteria;c__uncultured soil bacterium	0	0.000156272	0.000260453	0.000138908
k__Bacteria;p__Latescibacteria;c__uncultured soil bacterium PRR-12	0	0.000104181	0.000312543	0.000138908
k__Archaea;p__Euryarchaeota;c__Thermoplasmata	0	0.000104181	0.00029518	0.00013312
k__Bacteria;p__Planctomycetes;c__Phycisphaerae	0.000190999	0.000173635	0	0.000121545
k__Bacteria;p__Entotheonellaeota;c__Entotheonellia	0.000243089	6.94541e-05	5.20906e-05	0.000121545
k__Bacteria;p__Cyanobacteria;c__Oxyphotobacteria	0.000104181	0.000138908	0.000121545	0.000121545
k__Bacteria;p__Armatimonadetes;c__Armatimonadia	0	0.000277816	3.4727e-05	0.000104181
k__Bacteria;p__Armatimonadetes;c__uncultured	3.4727e-05	3.4727e-05	0.000208362	9.26055e-05
k__Bacteria;p__Armatimonadetes;c__Fimbriimonadia	0.000173635	6.94541e-05	1.73635e-05	8.68176e-05
k__Bacteria;p__Chloroflexi;c__SHA-26	0	5.20906e-05	0.000173635	7.52419e-05
k__Bacteria;p__Chloroflexi;c__OLB14	0	0.000173635	3.4727e-05	6.94541e-05
k__Bacteria;p__Chlamydiae;c__Chlamydiae	0	6.94541e-05	0.000121545	6.36662e-05
k__Bacteria;p__Latescibacteria;c__uncultured Latescibacteria bacterium	0.000173635	0	0	5.78784e-05
k__Bacteria;p__WPS-2;c__metagenome	8.68176e-05	8.68176e-05	0	5.78784e-05
k__Bacteria;p__Planctomycetes;c__Pla4 lineage	3.4727e-05	6.94541e-05	5.20906e-05	5.20906e-05
k__Bacteria;p__Proteobacteria;c__unclassified_Proteobacteria	0.000104181	5.20906e-05	0	5.20906e-05
k__Bacteria;p__Firmicutes;c__Clostridia	0	0.000121545	3.4727e-05	5.20906e-05
k__Bacteria;p__Acidobacteria;c__unclassified_Acidobacteria	8.68176e-05	1.73635e-05	1.73635e-05	4.05149e-05
k__Bacteria;p__Fibrobacteres;c__Fibrobacteria	0.000121545	0	0	4.05149e-05
k__Bacteria;p__Patescibacteria;c__Microgenomatia	6.94541e-05	1.73635e-05	1.73635e-05	3.4727e-05
k__Bacteria;p__Elusimicrobia;c__Lineage IIb	8.68176e-05	0	0	2.89392e-05
k__Bacteria;p__Acidobacteria;c__Subgroup 22	0	3.4727e-05	5.20906e-05	2.89392e-05
k__Bacteria;p__Chloroflexi;c__unclassified_Chloroflexi	3.4727e-05	1.73635e-05	3.4727e-05	2.89392e-05
k__Bacteria;p__Elusimicrobia;c__uncultured Acidobacteria bacterium	0	5.20906e-05	3.4727e-05	2.89392e-05
k__Bacteria;p__FCPU426;c__metagenome	3.4727e-05	5.20906e-05	0	2.89392e-05
k__Bacteria;p__Firmicutes;c__Erysipelotrichia	6.94541e-05	0	0	2.31514e-05
k__Bacteria;p__Patescibacteria;c__Gracilibacteria	0	5.20906e-05	1.73635e-05	2.31514e-05
k__Bacteria;p__Acidobacteria;c__Subgroup 18	5.20906e-05	0	0	1.73635e-05
k__Bacteria;p__Patescibacteria;c__WS6 (Dojkabacteria)	5.20906e-05	0	0	1.73635e-05
k__Bacteria;p__WPS-2;c__unclassified_WPS-2	5.20906e-05	0	0	1.73635e-05
k__Bacteria;p__BRC1;c__unclassified_BRC1	3.4727e-05	0	0	1.15757e-05
k__Bacteria;p__BRC1;c__uncultured bacterium	3.4727e-05	0	0	1.15757e-05
k__Bacteria;p__Deferribacteres;c__Deferribacteres	3.4727e-05	0	0	1.15757e-05
k__Bacteria;p__Latescibacteria;c__uncultured Fibrobacteres bacterium	3.4727e-05	0	0	1.15757e-05
k__Bacteria;p__Patescibacteria;c__unclassified_Patescibacteria	0	0	3.4727e-05	1.15757e-05
k__Bacteria;p__Spirochaetes;c__Spirochaetia	0	0	3.4727e-05	1.15757e-05
k__Bacteria;p__Cyanobacteria;c__Sericytochromatia	0	0	1.73635e-05	5.78784e-06
k__Bacteria;p__Elusimicrobia;c__Lineage IIc	0	0	1.73635e-05	5.78784e-06
k__Bacteria;p__FBP;c__metagenome	0	0	1.73635e-05	5.78784e-06
