# Supplementary material for: Macrofungi Cultivation in Shady Forest Areas Significantly Increases Microbiome Diversity, Abundance and Functional Capacity in Soil Furrows
Source: J Fungi (Basel). 2021 Sep 18;7(9):775. doi: 10.3390/jof7090775 (PMC8469386; doi:10.3390/jof7090775)
Supplement: Supplementary file 1 [file jof-07-00775-s001.zip › Supplementary Tables S3.xlsx]

## Sheet: Table S3
Supplementary Table 3. Relative abundances (%) of soil fungal phylum in Stropharia rugosoannulata cultivation plots.
Phylum level	Control	Lessly influenced	Strongly influenced	Mean
k__Fungi;p__Basidiomycota	0.795584	0.850914	0.76279	0.803096
k__Fungi;p__Ascomycota	0.178045	0.119293	0.227669	0.175002
k__Fungi;p__unclassified_Fungi	0.0160501	0.015866	0.00399627	0.0119708
k__Fungi;p__unidentified	0.00780844	0.0115556	0.00420204	0.00785537
k__Fungi;p__Mortierellomycota	0.00183027	0.00211185	0.0011913	0.00171114
k__Fungi;p__Mucoromycota	0.000584821	1.083e-05	0	0.00019855
k__Fungi;p__Chytridiomycota	2.166e-05	0.00015162	0.00012996	0.00010108
k__Fungi;p__Rozellomycota	5.41501e-05	9.74701e-05	2.166e-05	5.77601e-05
k__Fungi;p__Kickxellomycota	2.166e-05	0	0	7.22001e-06
