# Supplementary material for: Macrofungi Cultivation in Shady Forest Areas Significantly Increases Microbiome Diversity, Abundance and Functional Capacity in Soil Furrows
Source: J Fungi (Basel). 2021 Sep 18;7(9):775. doi: 10.3390/jof7090775 (PMC8469386; doi:10.3390/jof7090775)
Supplement: Supplementary file 1 [file jof-07-00775-s001.zip › Supplementary Tables S4.xlsx]

## Sheet: Table S4
Supplementary Table 4. Relative abundances (%) of soil fungal class in Stropharia rugosoannulata cultivation plots.
Class level	Control	Lessly influenced	Strongly influenced	Mean
k__Fungi;p__Basidiomycota;c__Agaricomycetes	0.774378	0.675674	0.60595	0.685334
k__Fungi;p__Basidiomycota;c__Tremellomycetes	0.0196023	0.172056	0.155811	0.115823
k__Fungi;p__Ascomycota;c__Eurotiomycetes	0.109372	0.0213243	0.0305298	0.0537421
k__Fungi;p__Ascomycota;c__Sordariomycetes	0.00382299	0.00775429	0.123267	0.0449482
k__Fungi;p__Ascomycota;c__Pezizomycetes	0.0298908	0.0250282	0.0416847	0.0322012
k__Fungi;p__Ascomycota;c__Leotiomycetes	0.0286346	0.0285912	0.0176313	0.0249523
k__Fungi;p__unclassified_Fungi;c__unclassified_Fungi	0.0160501	0.015866	0.00399627	0.0119708
k__Fungi;p__Ascomycota;c__unclassified_Ascomycota	0.00206853	0.0172197	0.00921634	0.00950153
k__Fungi;p__Ascomycota;c__Dothideomycetes	0.00307572	0.0177179	0.0044728	0.00842214
k__Fungi;p__unidentified;c__unidentified	0.00780844	0.0115556	0.00420204	0.00785537
k__Fungi;p__Mortierellomycota;c__Mortierellomycetes	0.00183027	0.00211185	0.0011913	0.00171114
k__Fungi;p__Ascomycota;c__Archaeorhizomycetes	0.00114798	0.00152703	0.000823081	0.00116603
k__Fungi;p__Basidiomycota;c__Geminibasidiomycetes	0.000584821	0.00193857	0.00040071	0.000974701
k__Fungi;p__Basidiomycota;c__Microbotryomycetes	0.000866401	0.000953041	0.00036822	0.000729221
k__Fungi;p__Mucoromycota;c__Umbelopsidomycetes	0.000584821	1.083e-05	0	0.00019855
k__Fungi;p__Basidiomycota;c__unclassified_Basidiomycota	0.00012996	9.74701e-05	0.00011913	0.00011552
k__Fungi;p__Chytridiomycota;c__Chytridiomycetes	2.166e-05	0.00015162	0.00012996	0.00010108
k__Fungi;p__Basidiomycota;c__Agaricostilbomycetes	0	0.00018411	9.74701e-05	9.38601e-05
k__Fungi;p__Rozellomycota;c__unidentified	5.41501e-05	9.74701e-05	2.166e-05	5.77601e-05
k__Fungi;p__Ascomycota;c__Saccharomycetes	3.249e-05	9.74701e-05	2.166e-05	5.05401e-05
k__Fungi;p__Basidiomycota;c__GS27	0	0	3.249e-05	1.083e-05
k__Fungi;p__Ascomycota;c__Orbiliomycetes	0	1.083e-05	2.166e-05	1.083e-05
k__Fungi;p__Ascomycota;c__Lecanoromycetes	0	2.166e-05	0	7.22001e-06
k__Fungi;p__Basidiomycota;c__unidentified	2.166e-05	0	0	7.22001e-06
k__Fungi;p__Kickxellomycota;c__Kickxellomycetes	2.166e-05	0	0	7.22001e-06
k__Fungi;p__Basidiomycota;c__Dacrymycetes	0	1.083e-05	0	3.61e-06
k__Fungi;p__Basidiomycota;c__Malasseziomycetes	0	0	1.083e-05	3.61e-06
