# Supplementary material for: Macrofungi Cultivation in Shady Forest Areas Significantly Increases Microbiome Diversity, Abundance and Functional Capacity in Soil Furrows
Source: J Fungi (Basel). 2021 Sep 18;7(9):775. doi: 10.3390/jof7090775 (PMC8469386; doi:10.3390/jof7090775)
Supplement: Supplementary file 1 [file jof-07-00775-s001.zip › Supplementary Tables S5.xlsx]

## Sheet: Table S5
Supplementary Table 5. Relative abundances (%) of soil fungal genus in Stropharia rugosoannulata cultivation plots.
Genus level	Control	Lessly influenced	Strongly influenced	Mean
k__Fungi;p__Basidiomycota;c__Agaricomycetes;o__Boletales;f__Suillaceae;g__Suillus	0.368459	0.108224	0.20642	0.227701
k__Fungi;p__Basidiomycota;c__Tremellomycetes;o__Tremellales;f__Trimorphomycetaceae;g__Saitozyma	0.0157902	0.149476	0.146205	0.103824
k__Fungi;p__Basidiomycota;c__Agaricomycetes;o__Agaricales;f__Tricholomataceae;g__Tricholoma	0.296093	0.000898891	9.74701e-05	0.0990296
k__Fungi;p__Basidiomycota;c__Agaricomycetes;o__Russulales;f__Russulaceae;g__Russula	0.0528721	0.15031	0.0887195	0.0973004
k__Fungi;p__Basidiomycota;c__Agaricomycetes;o__Agaricales;f__Strophariaceae;g__Stropharia	0.00011913	0.00312987	0.236798	0.0800157
k__Fungi;p__Basidiomycota;c__Agaricomycetes;o__Thelephorales;f__Thelephoraceae;g__Thelephora	0.00393129	0.17093	0.0133859	0.0627491
k__Fungi;p__Basidiomycota;c__Agaricomycetes;o__Sebacinales;f__Sebacinaceae;g__Sebacina	0.00731026	0.129083	0.00424536	0.0468795
k__Fungi;p__Ascomycota;c__Sordariomycetes;o__Hypocreales;f__Nectriaceae;g__Gibberella	0.00012996	0.0001083	0.110455	0.0368979
k__Fungi;p__Ascomycota;c__Eurotiomycetes;o__Eurotiales;f__Trichocomaceae;g__Sagenomella	0.0769906	0.00543667	0.00970369	0.0307103
k__Fungi;p__Ascomycota;c__Pezizomycetes;o__Pezizales;f__Pyronemataceae;g__Trichophaea	0.0246058	0.0171439	0.0384141	0.0267212
k__Fungi;p__Ascomycota;c__Eurotiomycetes;o__Eurotiales;f__Aspergillaceae;g__Penicillium	0.02988	0.00856654	0.0173172	0.0185879
k__Fungi;p__Ascomycota;c__Leotiomycetes;o__Helotiales;f__Myxotrichaceae;g__Oidiodendron	0.0251365	0.0122921	0.0142306	0.0172197
k__Fungi;p__Basidiomycota;c__Tremellomycetes;o__Tremellales;f__Rhynchogastremataceae;g__Papiliotrema	0.00115881	0.0168732	0.007072	0.00836799
k__Fungi;p__Basidiomycota;c__Agaricomycetes;o__Agaricales;f__Inocybaceae;g__Inocybe	7.58101e-05	0.0181078	0.00331398	0.00716586
k__Fungi;p__Basidiomycota;c__Agaricomycetes;o__Thelephorales;f__Thelephoraceae;g__Tomentella	0.00405042	0.00442947	0.0103968	0.00629224
k__Fungi;p__Basidiomycota;c__Agaricomycetes;o__Thelephorales;f__Thelephoraceae;g__Pseudotomentella	0.00403959	0.00675793	0.00594568	0.00558107
k__Fungi;p__Basidiomycota;c__Agaricomycetes;o__Agaricales;f__Hygrophoraceae;g__Hygrocybe	0.0156819	0	6.49801e-05	0.00524895
k__Fungi;p__Ascomycota;c__Pezizomycetes;o__Pezizales;f__Pyronemataceae;g__unidentified	0.00528505	0.00755935	0.00278331	0.00520924
k__Fungi;p__unidentified;c__unidentified;o__unidentified;f__unidentified;g__unidentified	0.00780844	0.0115556	0.00420204	0.00785537
k__Fungi;p__Basidiomycota;c__Agaricomycetes;o__Sebacinales;f__unidentified;g__unidentified	0.00263169	0.0373202	0.00131043	0.0137541
k__Fungi;p__Basidiomycota;c__Agaricomycetes;o__unclassified_Agaricomycetes;f__unclassified_Agaricomycetes;g__unclassified_Agaricomycetes	0.00122379	0.0213351	0.0251365	0.0158985
k__Fungi;p__unclassified_Fungi;c__unclassified_Fungi;o__unclassified_Fungi;f__unclassified_Fungi;g__unclassified_Fungi	0.0160501	0.015866	0.00399627	0.0119708
k__Fungi;p__Ascomycota;c__unclassified_Ascomycota;o__unclassified_Ascomycota;f__unclassified_Ascomycota;g__unclassified_Ascomycota	0.00206853	0.0172197	0.00921634	0.00950153
