# Supplementary material for: Macrofungi Cultivation in Shady Forest Areas Significantly Increases Microbiome Diversity, Abundance and Functional Capacity in Soil Furrows
Source: J Fungi (Basel). 2021 Sep 18;7(9):775. doi: 10.3390/jof7090775 (PMC8469386; doi:10.3390/jof7090775)
Supplement: Supplementary file 1 [file jof-07-00775-s001.zip › Supplementary Tables S6.xlsx]

## Sheet: Table S6
Supplementary Table 6. Microbial community functional adundance predication based on MetaCyc genome database. The significant changed bacterial functional profiles in Stropharia rugosoannulata cultivation areas with different influencing intensities were shown in bold.
Bacteria (Low influence vs. Control)					Bacteria (Strong influence vs. control)					Bacteria (Strong vs. low influence)
Variable	mean-L	mean-B	p		Variable	mean-S	mean-B	p		Variable	mean-S	mean-L	p
Amino Acid Biosynthesis	1679.16	1593.68	0.563703		Amino Acid Biosynthesis	1580.89	1593.68	0.77283		Amino Acid Biosynthesis	1580.89	1679.16	0.386476
Carbohydrate Biosynthesis	1664.85	1616.71	0.77283		Carbohydrate Biosynthesis	1601.92	1616.71	1		Carbohydrate Biosynthesis	1601.92	1664.85	0.563703
Cofactor, Prosthetic Group, Electron Carrier, and Vitamin Biosynthesis	3972.1	3837.58	0.248213		Cofactor, Prosthetic Group, Electron Carrier, and Vitamin Biosynthesis	3665.74	3837.58	0.563703		Cofactor, Prosthetic Group, Electron Carrier, and Vitamin Biosynthesis	3665.74	3972.1	0.0832645
Fatty Acid and Lipid Biosynthesis	2167.67	2849.53	0.148915		Fatty Acid and Lipid Biosynthesis	2475.7	2849.53	0.386476		Fatty Acid and Lipid Biosynthesis	2475.7	2167.67	0.386476
Nucleoside and Nucleotide Biosynthesis	2367.67	2301.85	0.148915		Nucleoside and Nucleotide Biosynthesis	2314.58	2301.85	0.77283		Nucleoside and Nucleotide Biosynthesis	2314.58	2367.67	0.386476
Secondary Metabolite Biosynthesis	1645.39	1657.75	1		Secondary Metabolite Biosynthesis	1688.19	1657.75	0.563703		Secondary Metabolite Biosynthesis	1688.19	1645.39	0.563703
Amino Acid Degradation	615.736	689.379	0.77283		Amino Acid Degradation	709.343	689.379	1		Amino Acid Degradation	709.343	615.736	0.563703
C1 Compound Utilization and Assimilation	770.651	675.469	0.0209213		C1 Compound Utilization and Assimilation	715.189	675.469	0.0209213		C1 Compound Utilization and Assimilation	715.189	770.651	0.0832645
Carbohydrate Degradation	1244.78	1288.18	1		Carbohydrate Degradation	1220.48	1288.18	0.77283		Carbohydrate Degradation	1220.48	1244.78	1
Degradation/Utilization/Assimilation - Other	576.284	469.167	0.563703		Degradation/Utilization/Assimilation - Other	450.969	469.167	1		Degradation/Utilization/Assimilation - Other	450.969	576.284	0.563703
Fatty Acid and Lipid Degradation	2460.12	2086.2	0.0209213		Fatty Acid and Lipid Degradation	2295.92	2086.2	0.148915		Fatty Acid and Lipid Degradation	2295.92	2460.12	0.148915
Inorganic Nutrient Metabolism	693.421	623.717	0.0209213		Inorganic Nutrient Metabolism	647.58	623.717	0.386476		Inorganic Nutrient Metabolism	647.58	693.421	0.248213
Nucleoside and Nucleotide Degradation	767.619	1012.55	0.0209213		Nucleoside and Nucleotide Degradation	874.402	1012.55	0.0832645		Nucleoside and Nucleotide Degradation	874.402	767.619	0.148915
Fermentation	1394.18	1512.43	0.563703		Fermentation	1408.63	1512.43	0.148915		Fermentation	1408.63	1394.18	0.77283
Glycolysis	706.627	673.439	0.148915		Glycolysis	679.082	673.439	0.563703		Glycolysis	679.082	706.627	0.248213
Pentose Phosphate Pathways	1068.6	1010.43	0.248213		Pentose Phosphate Pathways	1070.63	1010.43	0.563703		Pentose Phosphate Pathways	1070.63	1068.6	1
Respiration	6074.85	5702.46	0.0433081		Respiration	5465.56	5702.46	0.563703		Respiration	5465.56	6074.85	0.0433081
TCA cycle	1104.02	1019.61	0.0209213		TCA cycle	988.701	1019.61	0.386476		TCA cycle	988.701	1104.02	0.0433081
chitin degradation to ethanol	265.375	596.875	0.0433081		chitin degradation to ethanol	493.341	596.875	0.563703		chitin degradation to ethanol	493.341	265.375	0.148915
glyoxylate cycle	1367.96	1307.86	0.0209213		glyoxylate cycle	1257.86	1307.86	0.248213		glyoxylate cycle	1257.86	1367.96	0.0209213
methyl ketone biosynthesis	988.705	861.448	0.0209213		methyl ketone biosynthesis	959.458	861.448	0.0832645		methyl ketone biosynthesis	959.458	988.705	0.248213
Glycan Biosynthesis	744.002	755.74	0.77283		Glycan Biosynthesis	732.108	755.74	0.563703		Glycan Biosynthesis	732.108	744.002	0.563703
phospholipases	42.4699	54.0134	1		phospholipases	47.6736	54.0134	0.77283		phospholipases	47.6736	42.4699	0.563703
pyrimidine deoxyribonucleotide phosphorylation	772.868	655.378	0.0209213		pyrimidine deoxyribonucleotide phosphorylation	689.975	655.378	0.386476		pyrimidine deoxyribonucleotide phosphorylation	689.975	772.868	0.148915
pyrimidine deoxyribonucleotides biosynthesis from CTP	294.228	566.019	0.0433081		pyrimidine deoxyribonucleotides biosynthesis from CTP	477.325	566.019	0.248213		pyrimidine deoxyribonucleotides biosynthesis from CTP	477.325	294.228	0.248213
pyrimidine deoxyribonucleotides de novo biosynthesis I	948.059	784.513	0.0209213		pyrimidine deoxyribonucleotides de novo biosynthesis I	840.489	784.513	0.386476		pyrimidine deoxyribonucleotides de novo biosynthesis I	840.489	948.059	0.0832645
tRNA charging	978.935	918.578	0.148915		tRNA charging	899.795	918.578	0.77283		tRNA charging	899.795	978.935	0.0832645
Fungi (Low influence vs. Control)					Fungi (Strong influence vs. control)					Fungi (Strong vs. low influence)
Variable	mean-L	mean-B	p		Variable	mean-S	mean-B	p		Variable	mean-S	mean-L	p
Amine and Polyamine Biosynthesis	96.6392	132.225	0.0209213		Amine and Polyamine Biosynthesis	82.0054	132.225	0.0209213		Amine and Polyamine Biosynthesis	82.0054	96.6392	0.0433081
Amino Acid Biosynthesis	23337.8	22730.7	0.386476		Amino Acid Biosynthesis	24068.3	22730.7	0.0209213		Amino Acid Biosynthesis	24068.3	23337.8	0.386476
Aromatic Compound Biosynthesis	1336.86	1298.47	0.248213		Aromatic Compound Biosynthesis	1392.96	1298.47	0.0832645		Aromatic Compound Biosynthesis	1392.96	1336.86	0.248213
Carbohydrate Biosynthesis	7370.79	7245.09	0.563703		Carbohydrate Biosynthesis	7524.74	7245.09	0.0209213		Carbohydrate Biosynthesis	7524.74	7370.79	1
Cell Structure Biosynthesis	3231.87	3362.36	0.0832645		Cell Structure Biosynthesis	3268.82	3362.36	0.148915		Cell Structure Biosynthesis	3268.82	3231.87	0.386476
Cofactor, Prosthetic Group, Electron Carrier, and Vitamin Biosynthesis	17999.1	17877.6	0.248213		Cofactor, Prosthetic Group, Electron Carrier, and Vitamin Biosynthesis	18126.3	17877.6	0.248213		Cofactor, Prosthetic Group, Electron Carrier, and Vitamin Biosynthesis	18126.3	17999.1	0.77283
Fatty Acid and Lipid Biosynthesis	16703.7	16127.7	0.248213		Fatty Acid and Lipid Biosynthesis	16432.8	16127.7	0.148915		Fatty Acid and Lipid Biosynthesis	16432.8	16703.7	0.77283
Metabolic Regulator Biosynthesis	362.614	342.101	0.77283		Metabolic Regulator Biosynthesis	353.129	342.101	0.77283		Metabolic Regulator Biosynthesis	353.129	362.614	0.77283
Nucleoside and Nucleotide Biosynthesis	14544.1	14205	0.563703		Nucleoside and Nucleotide Biosynthesis	15033.1	14205	0.0209213		Nucleoside and Nucleotide Biosynthesis	15033.1	14544.1	0.248213
Other Biosynthesis	464.041	411.697	0.386476		Other Biosynthesis	495.326	411.697	0.148915		Other Biosynthesis	495.326	464.041	0.563703
Secondary Metabolite Biosynthesis	3690.84	3603.16	0.386476		Secondary Metabolite Biosynthesis	3814.06	3603.16	0.0433081		Secondary Metabolite Biosynthesis	3814.06	3690.84	0.148915
Amine and Polyamine Degradation	591.084	749.138	0.0433081		Amine and Polyamine Degradation	503.859	749.138	0.0209213		Amine and Polyamine Degradation	503.859	591.084	0.148915
Amino Acid Degradation	1933.01	1821.43	1		Amino Acid Degradation	1862.56	1821.43	1		Amino Acid Degradation	1862.56	1933.01	0.77283
Aromatic Compound Degradation	1819.21	1794.91	0.77283		Aromatic Compound Degradation	1660.07	1794.91	0.0433081		Aromatic Compound Degradation	1660.07	1819.21	0.563703
C1 Compound Utilization and Assimilation	2967.69	2945.66	1		C1 Compound Utilization and Assimilation	3189.01	2945.66	0.0433081		C1 Compound Utilization and Assimilation	3189.01	2967.69	0.148915
Carbohydrate Degradation	1079.33	1133.63	0.386476		Carbohydrate Degradation	1095.83	1133.63	0.386476		Carbohydrate Degradation	1095.83	1079.33	0.77283
Carboxylate Degradation	366.074	332.78	0.77283		Carboxylate Degradation	382.563	332.78	0.148915		Carboxylate Degradation	382.563	366.074	0.77283
Chlorinated Compound Degradation	134.608	132.97	0.77283		Chlorinated Compound Degradation	116.743	132.97	0.248213		Chlorinated Compound Degradation	116.743	134.608	0.148915
Cofactor, Prosthetic Group, Electron Carrier Degradation	1.1916	0.0949668	0.0179605		Cofactor, Prosthetic Group, Electron Carrier Degradation	0.621596	0.0949668	0.0383936		Cofactor, Prosthetic Group, Electron Carrier Degradation	0.621596	1.1916	0.0433081
Degradation/Utilization/Assimilation - Other	230.911	313.284	0.386476		Degradation/Utilization/Assimilation - Other	282.966	313.284	0.386476		Degradation/Utilization/Assimilation - Other	282.966	230.911	0.386476
Fatty Acid and Lipid Degradation	1411.47	1493.04	0.386476		Fatty Acid and Lipid Degradation	1309.55	1493.04	0.0209213		Fatty Acid and Lipid Degradation	1309.55	1411.47	0.148915
Inorganic Nutrient Metabolism	1264.09	1261.76	0.77283		Inorganic Nutrient Metabolism	1113.78	1261.76	0.0209213		Inorganic Nutrient Metabolism	1113.78	1264.09	0.148915
Nucleoside and Nucleotide Degradation	4216.92	4136.79	0.0832645		Nucleoside and Nucleotide Degradation	4277	4136.79	0.148915		Nucleoside and Nucleotide Degradation	4277	4216.92	1
Polymeric Compound Degradation	764.301	823.499	0.148915		Polymeric Compound Degradation	773.759	823.499	0.386476		Polymeric Compound Degradation	773.759	764.301	0.77283
Secondary Metabolite Degradation	2078.05	2159.07	0.386476		Secondary Metabolite Degradation	2061.07	2159.07	0.77283		Secondary Metabolite Degradation	2061.07	2078.05	0.77283
Antibiotic Resistance	4.08735	3.07009	0.77283		Antibiotic Resistance	3.44669	3.07009	0.248213		Antibiotic Resistance	3.44669	4.08735	1
1,5-anhydrofructose degradation	18.9771	31.2181	0.0832645		1,5-anhydrofructose degradation	31.0373	31.2181	0.77283		1,5-anhydrofructose degradation	31.0373	18.9771	0.248213
Entner-Duodoroff Pathways	1.88862	6.99082	0.166349		Entner-Duodoroff Pathways	1.07007	6.99082	0.166349		Entner-Duodoroff Pathways	1.07007	1.88862	0.850107
Fermentation	7344.86	7581.44	0.248213		Fermentation	7069.58	7581.44	0.0209213		Fermentation	7069.58	7344.86	0.148915
Glycolysis	3394.85	3476.8	0.248213		Glycolysis	3392.59	3476.8	0.0433081		Glycolysis	3392.59	3394.85	1
Pentose Phosphate Pathways	1740.32	1694.78	0.386476		Pentose Phosphate Pathways	1796.61	1694.78	0.0433081		Pentose Phosphate Pathways	1796.61	1740.32	0.148915
Photosynthesis	1946.97	1896.72	0.148915		Photosynthesis	2020.1	1896.72	0.0832645		Photosynthesis	2020.1	1946.97	0.148915
Respiration	3932.62	4043.02	0.0209213		Respiration	3932.32	4043.02	0.0209213		Respiration	3932.32	3932.62	1
TCA cycle	7110.61	7091.98	0.563703		TCA cycle	7263.51	7091.98	0.563703		TCA cycle	7263.51	7110.61	0.248213
ethylmalonyl-CoA pathway	194.933	217.041	0.248213		ethylmalonyl-CoA pathway	160.149	217.041	0.0433081		ethylmalonyl-CoA pathway	160.149	194.933	0.248213
formaldehyde oxidation I	16.7348	11.6392	0.248213		formaldehyde oxidation I	21.9721	11.6392	0.0832645		formaldehyde oxidation I	21.9721	16.7348	0.563703
glyoxylate cycle	841.743	844.384	0.77283		glyoxylate cycle	822.303	844.384	0.148915		glyoxylate cycle	822.303	841.743	0.563703
isopropanol biosynthesis	439.72	455.198	0.386476		isopropanol biosynthesis	408.362	455.198	0.148915		isopropanol biosynthesis	408.362	439.72	0.148915
methyl ketone biosynthesis	124.658	206.988	0.0209213		methyl ketone biosynthesis	88.4948	206.988	0.0209213		methyl ketone biosynthesis	88.4948	124.658	0.0209213
methylaspartate cycle	33.0133	69.3936	0.0209213		methylaspartate cycle	36.0823	69.3936	0.0832645		methylaspartate cycle	36.0823	33.0133	1
Glycan Biosynthesis	1011.89	950.653	0.77283		Glycan Biosynthesis	1070.97	950.653	0.0209213		Glycan Biosynthesis	1070.97	1011.89	0.77283
Glycan Degradation	1252.01	1233.06	0.77283		Glycan Degradation	1277.65	1233.06	0.148915		Glycan Degradation	1277.65	1252.01	0.563703
Nucleic Acid Processing	1503.55	1352.62	0.0209213		Nucleic Acid Processing	1558.61	1352.62	0.0209213		Nucleic Acid Processing	1558.61	1503.55	0.248213
phospholipases	2.1482	0.17777	0.0201646		phospholipases	1.19193	0.17777	0.0814291		phospholipases	1.19193	2.1482	0.248213
pyrimidine deoxyribonucleotide phosphorylation	1262.11	1219.29	0.386476		pyrimidine deoxyribonucleotide phosphorylation	1311.55	1219.29	0.0433081		pyrimidine deoxyribonucleotide phosphorylation	1311.55	1262.11	0.148915
pyrimidine deoxyribonucleotides biosynthesis from CTP	3.6427	4.20734	0.77283		pyrimidine deoxyribonucleotides biosynthesis from CTP	5.35885	4.20734	1		pyrimidine deoxyribonucleotides biosynthesis from CTP	5.35885	3.6427	0.386476
pyrimidine deoxyribonucleotides de novo biosynthesis I	912.609	937.66	0.563703		pyrimidine deoxyribonucleotides de novo biosynthesis I	900.402	937.66	0.0832645		pyrimidine deoxyribonucleotides de novo biosynthesis I	900.402	912.609	0.563703
pyrimidine deoxyribonucleotides de novo biosynthesis III	876.13	853.398	0.77283		pyrimidine deoxyribonucleotides de novo biosynthesis III	934.192	853.398	0.0832645		pyrimidine deoxyribonucleotides de novo biosynthesis III	934.192	876.13	0.386476
pyrimidine deoxyribonucleotides de novo biosynthesis IV	2.55053	2.94629	0.77283		pyrimidine deoxyribonucleotides de novo biosynthesis IV	3.75174	2.94629	1		pyrimidine deoxyribonucleotides de novo biosynthesis IV	3.75174	2.55053	0.386476
tRNA charging	1127.74	1090.72	0.248213		tRNA charging	1158.07	1090.72	0.0209213		tRNA charging	1158.07	1127.74	0.77283
